# Supplementary material for: Increased Flux of Lipid Metabolism Enhances Bioethanol Fermentability and Inhibitor Tolerance of Xylose-Utilizing Zymomonas mobilis
Source: MDPI journal article supplement (doi:10.3390/fermentation9060569), 2023-06-16
Supplement: s1 [file s1]

## **Supplementary Information**

### **Metabolic engineering of *Zymomonas mobilis* for high-gravity fermentation to co-produce bioethanol and fatty acids**

Junyi Hu<sup>1</sup>, William Wang<sup>2</sup>, Feifei Zhang<sup>1</sup>, Xuequan Jiang<sup>1</sup>, Lida Peng<sup>1</sup>,

Yichao Fang<sup>1</sup>, Haoyong Wang<sup>1,\*</sup>

<sup>1</sup>Hubei Key Laboratory of Industrial Microbiology, Key Laboratory of Fermentation Engineering (Ministry of Education), National “111” Center for Cellular Regulation and Molecular Pharmaceutics, Hubei University of Technology, Wuhan 430068, PR China

<sup>2</sup>Grinnell College, 1115 8th Avenue, Grinnell, Iowa 50112, USA

\*Corresponding author: Prof. Haoyong Wang, haoyongw@163.com

Table S1. CCD experiment to find the optimum fermentation conditions.

| Experiment<br>No. | Coded setting values                         |                                  |                                 | Actual values                                     |                                      |                                 | Experimental<br>values for ethanol<br>production (g/kg) |
|-------------------|----------------------------------------------|----------------------------------|---------------------------------|---------------------------------------------------|--------------------------------------|---------------------------------|---------------------------------------------------------|
|                   | Hexose<br>concentration<br>(X <sub>1</sub> ) | Temperature<br>(X <sub>2</sub> ) | Initial pH<br>(X <sub>3</sub> ) | Hexose<br>concentration<br>(X <sub>1</sub> , g/L) | Temperature<br>(X <sub>2</sub> , °C) | Initial pH<br>(X <sub>3</sub> ) |                                                         |
| 1                 | 0                                            | 0                                | -1.68                           | 305                                               | 33                                   | 5.0                             | 126.1                                                   |
| 2                 | 1                                            | 1                                | -1                              | 340                                               | 36                                   | 5.6                             | 129.1                                                   |
| 3                 | 1.68                                         | 0                                | 0                               | 364                                               | 33                                   | 6.5                             | 126.1                                                   |
| 4                 | 1                                            | -1                               | -1                              | 340                                               | 30                                   | 5.6                             | 124.2                                                   |
| 5                 | 0                                            | 0                                | 0                               | 305                                               | 33                                   | 6.5                             | 141.6                                                   |
| 6                 | 1                                            | -1                               | 1                               | 340                                               | 30                                   | 7.4                             | 127.9                                                   |
| 7                 | -1                                           | -1                               | 1                               | 270                                               | 30                                   | 7.4                             | 119.6                                                   |
| 8                 | 0                                            | 0                                | 1.68                            | 305                                               | 33                                   | 8.0                             | 135.5                                                   |
| 9                 | 1                                            | 1                                | 1                               | 340                                               | 36                                   | 7.4                             | 132.3                                                   |
| 10                | -1                                           | 1                                | 1                               | 270                                               | 36                                   | 7.4                             | 125.1                                                   |
| 11                | 0                                            | -1.68                            | 0                               | 305                                               | 28                                   | 6.5                             | 122.6                                                   |
| 12                | -1                                           | 1                                | -1                              | 270                                               | 36                                   | 5.6                             | 121.4                                                   |
| 13                | 0                                            | 1.68                             | 0                               | 305                                               | 38                                   | 6.5                             | 131.4                                                   |
| 14                | 0                                            | 0                                | 0                               | 305                                               | 33                                   | 6.5                             | 142.1                                                   |
| 15                | -1                                           | -1                               | -1                              | 270                                               | 30                                   | 5.6                             | 115.5                                                   |
| 16                | -1.68                                        | 0                                | 0                               | 246                                               | 33                                   | 6.5                             | 112.9                                                   |
| 17                | 0                                            | 0                                | 0                               | 305                                               | 33                                   | 6.5                             | 141.3                                                   |

Results represent the mean of three experiments.

Table S2. Analysis of Variance (ANOVA) of the CCD experiment on optimum fermentation conditions

| Source                          | Sum of squares | Degree of freedom | Mean square | F-value | P-value                  |
|---------------------------------|----------------|-------------------|-------------|---------|--------------------------|
| Model                           | 1201.76        | 9                 | 133.53      | 237.98  | < 0.0001 (significant)   |
| •Hexose concentration ( $X_1$ ) | 214.31         | 1                 | 214.31      | 381.95  | < 0.0001                 |
| •Temperature ( $X_2$ )          | 92.28          | 1                 | 92.28       | 164.46  | < 0.0001                 |
| •Initial pH ( $X_3$ )           | 68.16          | 1                 | 68.16       | 121.47  | < 0.0001                 |
| • $X_1^2$                       | 708.78         | 1                 | 708.78      | 1263.2  | < 0.0001                 |
| • $X_2^2$                       | 313.99         | 1                 | 313.99      | 559.6   | < 0.0001                 |
| • $X_3^2$                       | 174.47         | 1                 | 174.47      | 310.95  | < 0.0001                 |
| • $X_1 X_2$                     | 0.55           | 1                 | 0.55        | 0.98    | 0.3546                   |
| • $X_1 X_3$                     | 0.1            | 1                 | 0.1         | 0.18    | 0.6837                   |
| • $X_2 X_3$                     | 0.1            | 1                 | 0.1         | 0.18    | 0.6837                   |
| Lack of fit                     | 3.6            | 5                 | 0.72        | 4.41    | 0.1951 (not significant) |
| $R^2$                           |                |                   |             | 0.9967  |                          |
| $R^2$ Adjusted                  |                |                   |             | 0.9926  |                          |

Table S3. CCD experiment of hexose-xylose coupled fermentation at 33.5 °C and initial pH 6.75.

| Experiment No. | Coded setting values                        |                                        | Actual values                                    |                                             | Experimental values for ethanol production (g/kg) |
|----------------|---------------------------------------------|----------------------------------------|--------------------------------------------------|---------------------------------------------|---------------------------------------------------|
|                | Total sugar concentration (X <sub>4</sub> ) | Xylose concentration (X <sub>5</sub> ) | Total sugar concentration (X <sub>4</sub> , g/L) | Xylose concentration (X <sub>5</sub> , g/L) |                                                   |
| 1              | 0                                           | -1.41                                  | 305                                              | 1                                           | 143.1                                             |
| 2              | 0                                           | 0                                      | 305                                              | 100                                         | 137.9                                             |
| 3              | -1.41                                       | 0                                      | 255.5                                            | 100                                         | 115.2                                             |
| 4              | 0                                           | 0                                      | 305                                              | 100                                         | 137.6                                             |
| 5              | 0                                           | 1.41                                   | 305                                              | 199                                         | 111.9                                             |
| 6              | 1                                           | -1                                     | 340                                              | 30                                          | 134.8                                             |
| 7              | 0                                           | 0                                      | 305                                              | 100                                         | 138.2                                             |
| 8              | 1                                           | 1                                      | 340                                              | 170                                         | 115.3                                             |
| 9              | -1                                          | -1                                     | 270                                              | 30                                          | 131.2                                             |
| 10             | 1.41                                        | 0                                      | 355                                              | 100                                         | 122.3                                             |
| 11             | -1                                          | 1                                      | 270                                              | 170                                         | 109.9                                             |

Results represent the mean of three experiments.

Table S4. Analysis of Variance (ANOVA) of the CCD experiment on hexose-xylose coupled fermentation.

| Source                               | Sum of squares | Degree of freedom | Mean square | F-value | P-value                   |
|--------------------------------------|----------------|-------------------|-------------|---------|---------------------------|
| Model                                | 1511.02        | 5                 | 302.2       | 792.2   | < 0.0001<br>(significant) |
| •Total sugar concentration ( $X_4$ ) | 45.32          | 1                 | 45.32       | 118.8   | 0.0001                    |
| •Xylose concentration ( $X_5$ )      | 901.5          | 1                 | 901.5       | 2363.21 | < 0.0001                  |
| • $X_4^2$                            | 526.55         | 1                 | 526.55      | 1380.31 | < 0.0001                  |
| • $X_5^2$                            | 157.51         | 1                 | 157.51      | 412.89  | < 0.0001                  |
| • $X_4 X_5$                          | 0.81           | 1                 | 0.81        | 2.12    | 0.2049                    |
| Lack of fit                          | 1.73           | 3                 | 0.58        | 6.4     | 0.1382 (not significant)  |
| $R^2$                                |                |                   |             | 0.9987  |                           |
| $R^2$ Adjusted                       |                |                   |             | 0.9975  |                           |

Table S5. Ethanol fermentation results of *Z. mobilis* CP4, *Zm*-PMXFWTY and angel yeast (Corresponding to Figs 3C,D, Figs 4B,C, Fig. 5A, Figs 6B,C,D, and Figs 7F,G in the text).

| Fermentation parameters                                                                                          |                  |     | Measurement items  |                       |                                           |
|------------------------------------------------------------------------------------------------------------------|------------------|-----|--------------------|-----------------------|-------------------------------------------|
| 1.0 g/L urea, 0.5 g/L MgSO <sub>4</sub> ·7H <sub>2</sub> O,<br>1.0 g/L KH <sub>2</sub> PO <sub>4</sub> , 100 rpm |                  |     | <i>Zm</i> -PMXFWTY | <i>Z. mobilis</i> CP4 | Angel yeast ( <i>S. cerevisiae</i> S288C) |
| 10 g/L yeast<br>extract, initial pH<br>6.5, 33 °C, 72<br>hours                                                   | Initial          | 100 | 48.8 <sup>a</sup>  | 48.7                  | 47.5                                      |
|                                                                                                                  | glucose<br>(g/L) | 150 | 72.5               | 72.9                  | 70.8                                      |
|                                                                                                                  |                  | 200 | 96.9               | 91.8                  | 89.8                                      |
|                                                                                                                  |                  | 230 | 110.7              | 100.4                 | 98                                        |
|                                                                                                                  |                  | 250 | 119.6              | 106.1                 | 101                                       |
|                                                                                                                  |                  | 280 | 132.1              | 113.9                 | 89.7                                      |
|                                                                                                                  |                  | 300 | 140.4              | 104.8                 | 78                                        |
|                                                                                                                  |                  | 310 | 144.9              | 95.3                  |                                           |
|                                                                                                                  |                  | 320 | 144.5              | 80.5                  |                                           |
|                                                                                                                  |                  | 330 | 148.8              |                       | —                                         |
|                                                                                                                  |                  | 350 | 122.1              | —                     |                                           |
|                                                                                                                  |                  | 370 | 109.8              |                       |                                           |
|                                                                                                                  |                  |     |                    |                       |                                           |
| 250 g/L initial<br>glucose, 10 g/L<br>yeast extract,<br>33 °C, 72 hours                                          | Initial<br>pH    | 4.5 | 92.7               | 65.3                  | 82.5                                      |
|                                                                                                                  |                  | 5.0 | 107.4              | 80.0                  | 92.2                                      |
|                                                                                                                  |                  | 5.5 | 114.8              | 93.3                  | 97.7                                      |
|                                                                                                                  |                  | 6.0 | 119.2              | 102.2                 | 101.3                                     |
|                                                                                                                  |                  | 6.5 | 118.8              | 106.2                 | 101.5                                     |
|                                                                                                                  |                  | 7.0 | 119.6              | 106.1                 | 101.0                                     |
|                                                                                                                  |                  | 7.5 | 119.1              | 105.9                 | 101.3                                     |
|                                                                                                                  |                  | 8.0 | 115.5              | 102                   | 92.9                                      |
|                                                                                                                  |                  | 8.5 | 105.8              | 93.6                  | 75.1                                      |

|                        |          |     |                                              |                              |                              |
|------------------------|----------|-----|----------------------------------------------|------------------------------|------------------------------|
|                        |          | 9.0 | 74                                           | 75.3                         | 56.8                         |
| 250 g/L initial        | Temperat | 25  | 110.8                                        | 99.7                         | 96.6                         |
| glucose, 10 g/L        | ure (°C) | 28  | 118.8                                        | 104.8                        | 100.6                        |
| yeast extract, initial |          | 30  | 119.0                                        | 105.1                        | 99.7                         |
| pH 7.0, 72 hours       |          | 33  | 120.8                                        | 107.1                        | 102.0                        |
|                        |          | 35  | 120.0                                        | 102.8                        | 100.5                        |
|                        |          | 38  | 110.3                                        | 96.3                         | 92.8                         |
|                        |          | 40  | 103.8                                        | 80.6                         | 86.6                         |
|                        |          | 43  | 83.2                                         | 56.9                         | 77.4                         |
| 100 g total medium     | Time     | 8   | 6.9 g/kg EtOH (pH 5.7; 233.2 g/L residual    | 5 (pH 5.81; 237.2 g/L        | 7.4 (pH 5.6; 230.5 g/L       |
| (250 g/L initial       | (hours)  |     | glucose; 0.64 g CO <sub>2</sub> weight loss) | residual glucose; 0.46 g     | residual glucose; 0.46 g     |
| glucose, 10 g/L        |          |     |                                              | CO <sub>2</sub> weight loss) | CO <sub>2</sub> weight loss) |
| yeast extract,         |          | 16  | 19.8 (4.1; 205.9; 1.82)                      | 13.2 (4.6; 220; 1.19)        | 23.2 (3.64; 197.9; 2.12)     |
| 33 °C, initial pH      |          | 24  | 40.2 (3.19; 163.5; 3.62)                     | 22.9 (3.63; 200; 2.05)       | 43.4 (3.22; 154.6; 3.9)      |
| 7.0)                   |          | 32  | 74.2 (2.91; 97.8; 6.48)                      | 34.5 (3.26; 176.2; 3.06)     | 71.7 (2.99; 98.8; 6.28)      |
|                        |          | 40  | 97.9 (2.82; 54.8; 8.38)                      | 58 (3.15; 131.7; 5.04)       | 88.5 (2.89; 67.7; 7.64)      |
|                        |          | 48  | 111.9 (2.75; 30.2; 9.46)                     | 79.2 (3.07; 93.3; 6.76)      | 96.3 (2.83; 53.7; 8.26)      |
|                        |          | 56  | 118.1 (2.68; 18.9; 9.94)                     | 97.3 (3.02; 61.2; 8.18)      | 99.7 (2.79; 47.8; 8.52)      |
|                        |          | 64  | 120.8 (2.63; 14.1; 10.14)                    | 107.1 (2.99; 44.3; 8.93)     | 102 (2.8; 43.4; 8.7)         |
|                        |          | 72  | 122.1 (2.61; 12.1; 10.26)                    | 109.8 (2.92; 36.4; 9.21)     | 103.2 (2.76; 40.1; 8.8)      |
|                        |          | 80  | 121.9 (2.6; 11.7; 10.28)                     | 110 (2.93; 36; 9.25)         | 103.4 (2.77; 39.7; 8.83)     |
| 250 g/L initial        | Time     | 0   | Biomass (g/kg)                               | 0.25                         | 0.30                         |
| glucose, 10 g/L        | (hours)  | 4   |                                              | 0.31                         | 0.39                         |
| yeast extract,         |          | 8   |                                              | 0.46                         | 0.83                         |
| 33 °C, initial pH      |          | 12  |                                              | 0.71                         | 1.47                         |
| 7.0                    |          | 16  |                                              | 1.04                         | 2.33                         |

|                                                                |                             |     |                                                                            |           |      |      |
|----------------------------------------------------------------|-----------------------------|-----|----------------------------------------------------------------------------|-----------|------|------|
|                                                                |                             | 20  |                                                                            | 2.15      | 1.46 | 3.58 |
|                                                                |                             | 24  |                                                                            | 2.88      | 1.98 | 4.78 |
|                                                                |                             | 28  |                                                                            | 3.41      | 2.36 | 5.99 |
|                                                                |                             | 32  |                                                                            | 3.8       | 2.63 | 6.55 |
|                                                                |                             | 36  |                                                                            | 4.02      | 2.89 | 6.80 |
|                                                                |                             | 40  |                                                                            | 4.06      | 3.13 | 6.87 |
|                                                                |                             | 48  |                                                                            | 4.09      | 3.15 | 6.91 |
|                                                                |                             | 56  |                                                                            | 4.12      | 3.18 | 6.92 |
|                                                                |                             | 64  |                                                                            | 4.14      | 3.21 | 6.93 |
|                                                                |                             | 72  |                                                                            | 4.16      | 3.24 | 6.96 |
|                                                                |                             | 80  |                                                                            | 4.16      | 3.23 | 6.95 |
| 10 g/L yeast<br>extract, 33 °C,<br>initial pH 7.0, 24<br>hours | Initial<br>glucose<br>(g/L) | 230 | Colony-forming<br>units (CFU, ×<br>10 <sup>9</sup> /mL,<br>total/survival) | 16.2/15.1 |      |      |
|                                                                |                             | 250 |                                                                            | 17.3/16.1 |      |      |
|                                                                |                             | 280 |                                                                            | 19.3/17.8 |      |      |
|                                                                |                             | 300 |                                                                            | 20.5/18.7 |      |      |
|                                                                |                             | 310 |                                                                            | 21.6/19.0 |      |      |
|                                                                |                             | 320 |                                                                            | 21.7/19.1 |      |      |
|                                                                | Initial<br>xylose<br>(g/L)  | 350 |                                                                            | 16.3/13.5 | —    | —    |
|                                                                |                             | 370 |                                                                            | 15.4/12.3 |      |      |
|                                                                |                             | 230 |                                                                            | 11.6/10.7 |      |      |
|                                                                |                             | 250 |                                                                            | 12.8/11.7 |      |      |
| 312 g/L initial<br>glucose, 10 g/L                             | Time<br>(hours)             | 280 | 0.25 g/kg biomass<br>9 g/kg EtOH (291.6 g/L residual glucose;              | 14.2/12.3 |      |      |
|                                                                |                             | 300 |                                                                            | 11.3/9.2  |      |      |
|                                                                |                             | 310 |                                                                            | 10.1/7.9  |      |      |
|                                                                |                             | 0   |                                                                            |           |      |      |
|                                                                |                             | 8   |                                                                            |           | —    | —    |



|                     |         |     |                                             |         |     |      |
|---------------------|---------|-----|---------------------------------------------|---------|-----|------|
| yeast extract,      |         |     | 0.6 g/kg biomass)                           |         |     |      |
| 33.5 °C, initial pH |         | 16  | 26 (258.4; 1.68)                            |         |     |      |
| 6.75                |         | 24  | 51.7 (206.7; 3.47)                          |         |     |      |
|                     |         | 32  | 92.6 (126.8; 4.61)                          |         |     |      |
|                     |         | 40  | 119.7 (74.4; 4.93)                          |         |     |      |
|                     |         | 48  | 135.1 (44.4; 4.97)                          |         |     |      |
|                     |         | 56  | 142 (30.7; 5)                               |         |     |      |
|                     |         | 64  | 144.9 (25.3; 5.03)                          |         |     |      |
|                     |         | 72  | 146.7 (21.9; 5.05)                          |         |     |      |
|                     |         | 80  | 146.8 (21.6; 5.05)                          |         |     |      |
| 180 g/L initial     | Time    | 0   | 0.25 g/kg biomass                           |         |     |      |
| glucose, 90 g/L     | (hours) | 8   | 8.8 g/kg EtOH (168.7 g/L residual glucose;  |         |     |      |
| initial xylose, 42  |         |     | 84.4 g/L residual xylose; 39.3 g/L residual |         |     |      |
| g/L initial         |         |     | mannose; 0.59 g/kg biomass)                 |         |     |      |
| mannose, 10 g/L     |         | 16  | 25.3 (150.2; 75; 35; 1.64)                  |         |     |      |
| yeast extract,      |         | 24  | 50.3 (121.4; 60.6; 28.3; 3.39)              |         |     |      |
| 33.5 °C, initial pH |         | 32  | 90.1 (76.9; 38.5; 17.9; 4.49)               |         |     |      |
| 6.75                |         | 40  | 116.4 (47.8; 23.9; 11.2; 4.8)               |         |     |      |
|                     |         | 48  | 131.5 (31.1; 15.5; 7.3; 4.84)               |         |     |      |
|                     |         | 56  | 138.2 (23.4; 11.7; 5.5; 4.87)               |         |     |      |
|                     |         | 64  | 141 (20.4; 10.2; 4.7; 4.9)                  |         |     |      |
|                     |         | 72  | 142.8 (18.5; 9.3; 4.3; 4.92)                |         |     |      |
|                     |         | 80  | 142.9 (18.3; 9.2; 4.2; 4.92)                |         |     |      |
| 10 g/L yeast        | Initial | 150 | 72.2                                        | Initial | 150 | 51.2 |
| extract, initial pH | mannose | 200 | 96.6                                        | xylose  | 200 | 68.3 |
| 6.5, 33 °C, 72      | (g/L)   | 230 | 110                                         | (g/L)   | 230 | 77.2 |

|       |     |       |     |      |
|-------|-----|-------|-----|------|
| hours | 250 | 119.5 |     |      |
|       | 280 | 132.5 | 250 | 83.9 |
|       | 300 | 140.3 |     |      |
|       | 310 | 144.7 | 280 | 88.7 |
|       | 320 | 144.1 |     |      |
|       | 330 | 143.8 | 300 | 75.4 |
|       | 350 | 131.5 |     |      |
|       | 370 | 117.1 | 310 | 70.3 |

<sup>a</sup>Unless otherwise specified, the data tested defaults to ethanol production (g/kg), all results represent the mean of three experiments.
